# Supplementary material for: Morphology and dopant-dependent optical characteristics of novel composite 1D and 3D-based heterostructures of CdSe nanocrystals and LaPO4:Re (Re = Eu, Ce, Tb) metal phosphate nanowires
Source: Royal Society of Chemistry journal article supplement (doi:10.1039/c4ra05933f), 2014-01-01
Supplement: c4ra05933f1.pdf [file c4ra05933f1.pdf]

**Supporting Information for**  
**“Morphology and dopant-dependent optical characteristics of**  
**novel composite 1D and 3D-based heterostructures of**  
**CdSe nanocrystals and LaPO<sub>4</sub>: Re (Re = Eu, Ce, Tb) metal phosphate nanowires”**

Jinkyu Han<sup>1</sup>, Lei Wang<sup>2</sup>, and Stanislaus S. Wong<sup>1,2,\*</sup>

<sup>1</sup>Condensed Matter Physics and Materials Sciences Department, Building 480,  
Brookhaven National Laboratory, Upton NY 11973

<sup>2</sup>Department of Chemistry, State University of New York at Stony Brook,  
Stony Brook, NY 11794-3400

\*To whom correspondence should be addressed.

Email: [sswong@bnl.gov](mailto:sswong@bnl.gov), [stanislaus.wong@stonybrook.edu](mailto:stanislaus.wong@stonybrook.edu)

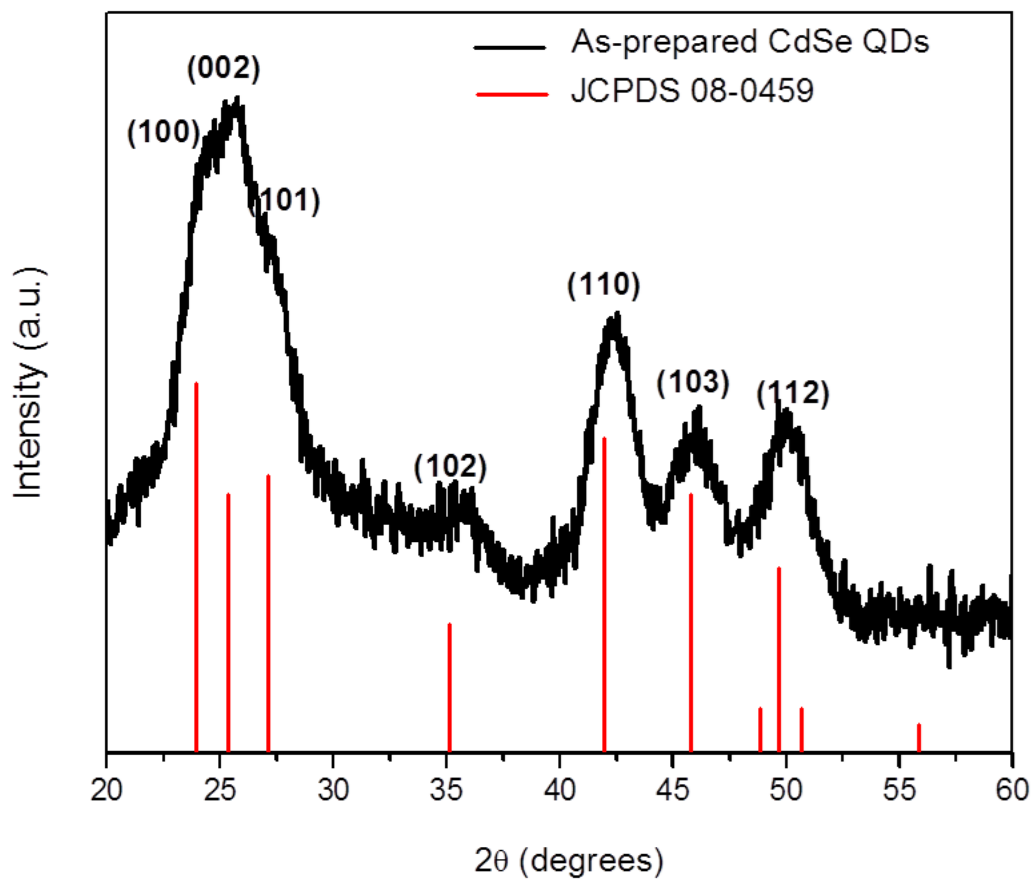

**Figure S1.** XRD patterns of as-prepared CdSe QDs (top, black) and the corresponding JCPDS No. 08-0459 database standard for bulk CdSe (bottom, red).

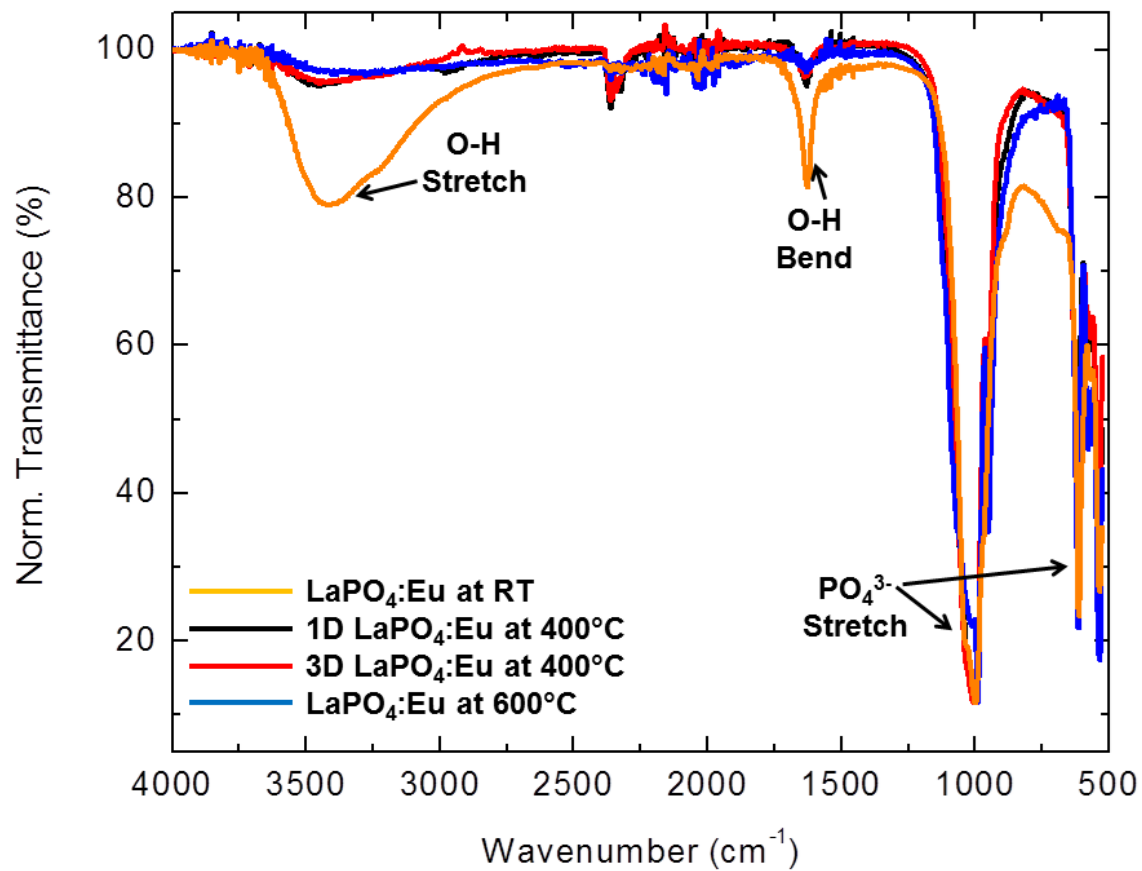

**Figure S2.** FT-IR spectra of  $\text{LaPO}_4:\text{Eu}$  nanostructures, possessing different morphologies and processed at varying post-annealing temperatures.

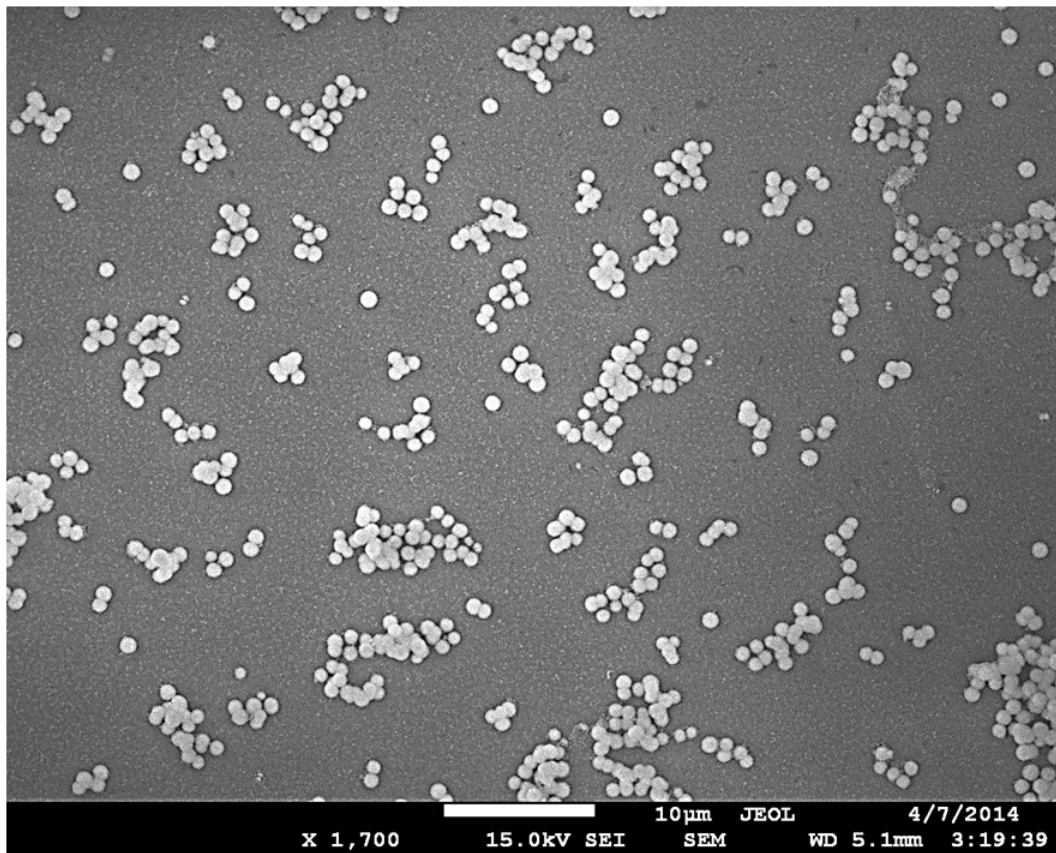

**Figure S3.** Representative lower magnification SEM image of LaPO<sub>4</sub>:Eu 3D urchin-like architectures.

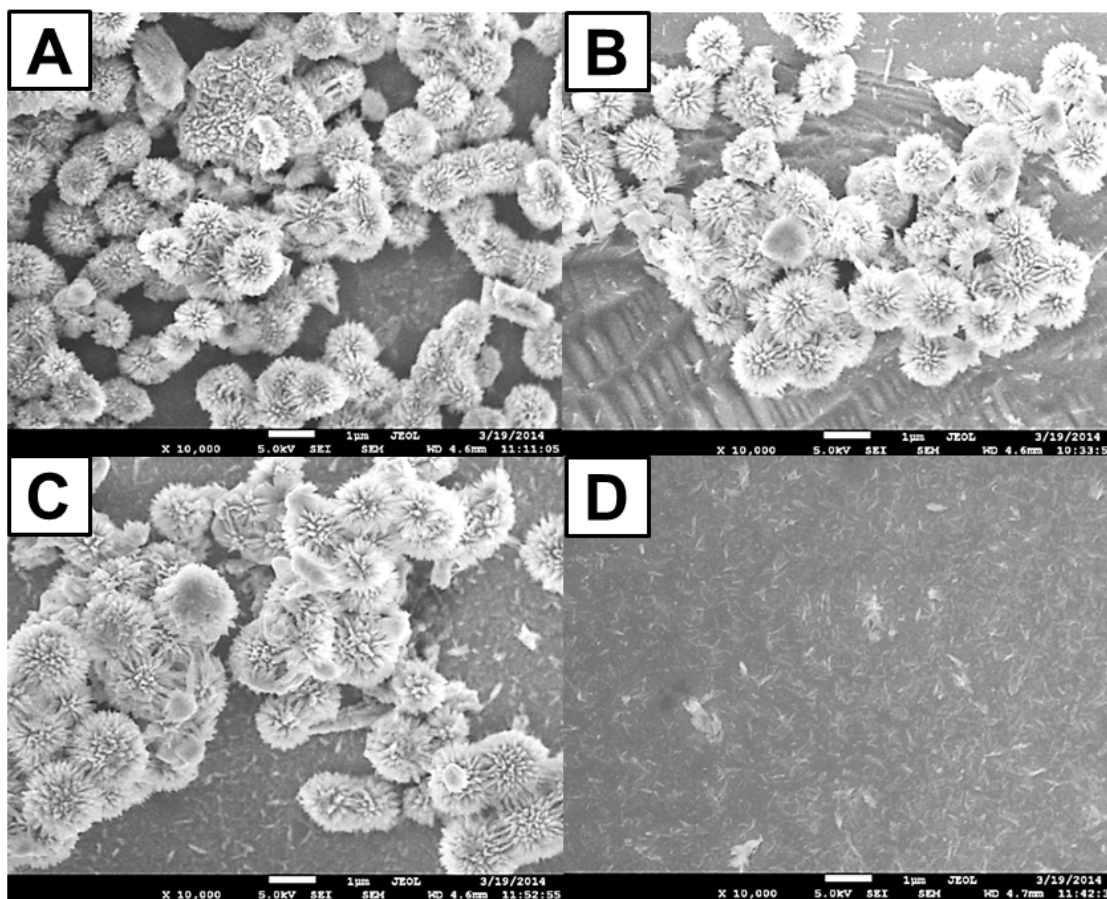

**Figure S4.** Representative SEM images of LaPO<sub>4</sub>:Eu heterostructures, prepared by solution-precipitation protocols in the presence of varying molar precursor ratios of La/P, set at (A) 0.5, (B) 0.75, (C) 1, and (D) 1.5. Reaction times for all samples shown were held constant at 2 h.

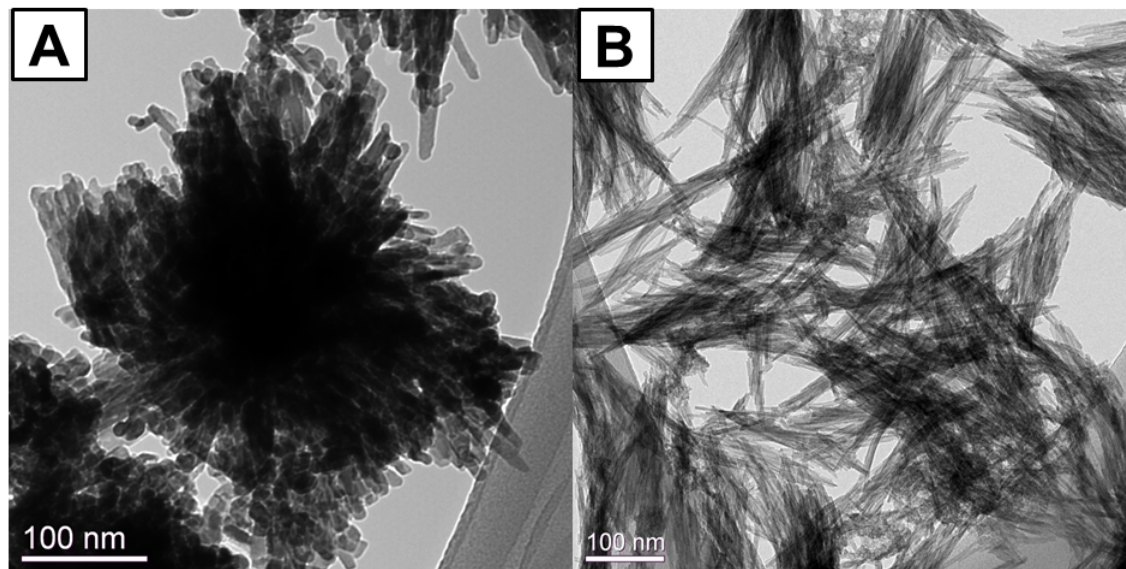

**Figure S5.** Representative TEM images of  $\text{LaPO}_4:\text{Eu}$  fabricated using a solution-precipitation approach in the presence of (A) 3-mercaptopropionic acid and (B) 11-mercaptoundecanoic acid, respectively.

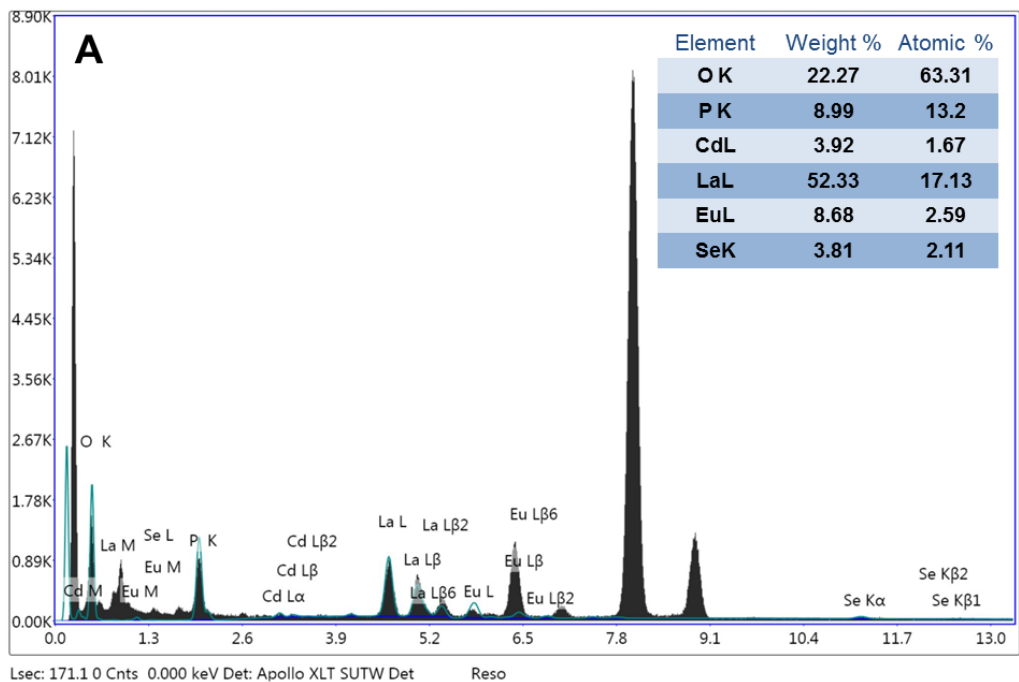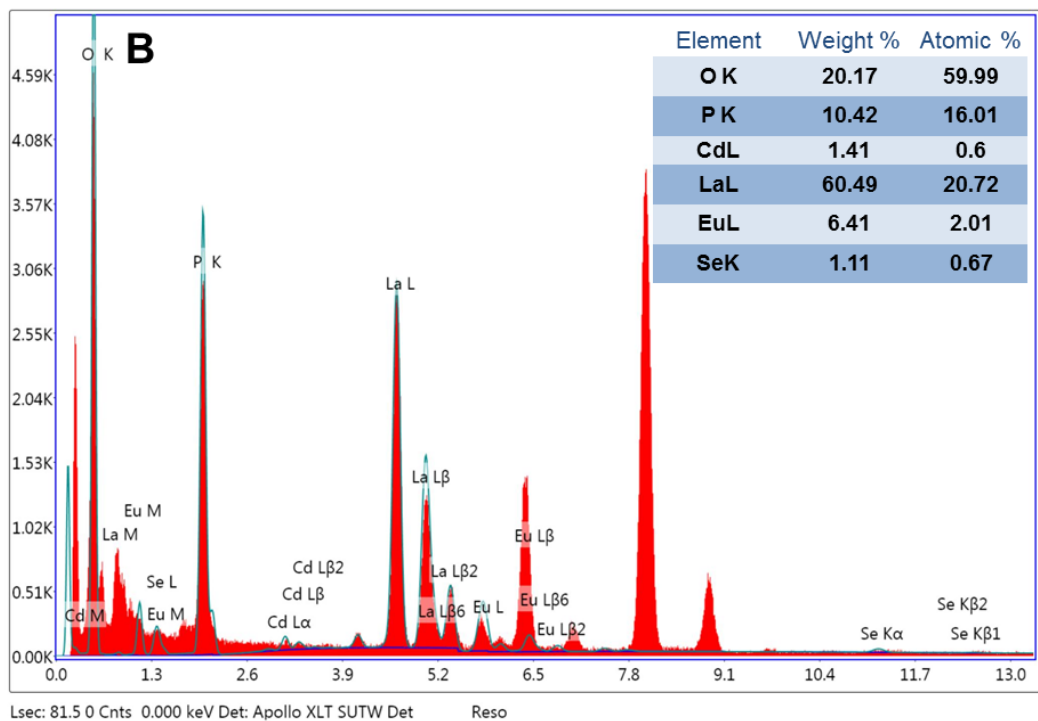

**Figure S6.** EDS spectra and quantitative elemental analysis data for AET-capped CdSe-LaPO<sub>4</sub>: Eu (A) 3D urchin-like and (B) 1D nanowire-based heterostructures.

### Calculation of coverage density of CdSe QDs on 1D and 3D LaPO<sub>4</sub> structures

The number of anchored dots on either the single LaPO<sub>4</sub> nanowire or 3D structures can be estimated by the following Equation S1.

$$\frac{W_{LaPO_4}}{W_{LaPO_4} + nW_{CdSe}} \approx \text{wt\% of LaPO}_4 \text{ in heterostructure (S1)}$$

wherein  $W_{LaPO_4}$  = weight of either a single LaPO<sub>4</sub> nanowire or 3D LaPO<sub>4</sub> heterostructure,  $W_{CdSe}$  = weight of a CdSe QD,  $n$  = the number of QDs attached onto the underlying LaPO<sub>4</sub>, and *wt% of LaPO<sub>4</sub> in heterostructure* are all obtained either directly or indirectly by examining the results of the EDS spectrum and corresponding EDS mapping.

Based on the EDS spectrum, the 3D-based heterostructures consist of nearly 92.3 wt % for LaPO<sub>4</sub>: Eu, and 7.7 wt% for CdSe QDs (Figure S6A). The volume of one 3D-based heterostructure of LaPO<sub>4</sub>: Eu is  $5.1 \times 10^{-14} \text{ cm}^3$  (with  $r_{3D-LaPO_4:Eu} \sim 230 \text{ nm}$ , as obtained by TEM analysis), assuming that the 3D structure can be visualized as a perfect sphere. Hence, the weight of a single 3D LaPO<sub>4</sub> is equal to  $2.63 \times 10^{-13} \text{ g}$  (assuming a density of LaPO<sub>4</sub> =  $4.19 \text{ g/cm}^3$ )<sup>1</sup>. On the other hand, the volume of a single CdSe QD is  $5.03 \times 10^{-20} \text{ cm}^3$  (with  $r_{CdSe} \sim 2.29 \text{ nm}$ , as obtained by TEM). Assuming the density of CdSe is equal to  $5.82 \text{ g/cm}^3$ , the as-obtained weight of a single CdSe QD is  $2.93 \times 10^{-19} \text{ g}$ . Hence, from all of these weight values, we calculate that the number of quantum dots ( $n$ ) attached onto a single discrete 3D LaPO<sub>4</sub>: Eu structure is estimated to be  $6.1 \times 10^4$  QDs, according to Equation S1.

Based on the EDS spectrum, the 1D-based heterostructures consist of nearly 97.5 wt % for LaPO<sub>4</sub>: Eu and 2.5 wt% for CdSe QDs (Figure S6B). By analogy, assuming a 1D nanowire can be represented as a very thin rectangular tube with a thickness of 1 nm, the corresponding volume of 1D LaPO<sub>4</sub>: Eu can be computed to be  $8.03 \times 10^{-18} \text{ cm}^3$ ,



based on a nanowire length of  $\sim 1100$  nm and corresponding width of 7.3 nm, as determined from TEM data. Therefore, using equation S1, we were able to calculate that  $\sim 2.94$  QDs are attached onto a single individual 1D  $\text{LaPO}_4$ : Eu nanowire.

In order to reasonably compare coverage densities, we need to normalize for the same volume of 1D and 3D heterostructures incorporating  $\text{LaPO}_4$ : Eu. Since the volume of 1D  $\text{LaPO}_4$ : Eu ( $8.03 \times 10^{-18} \text{ cm}^3$ ) is nearly four orders of magnitude smaller than that of the corresponding 3D structure ( $5.17 \times 10^{-14} \text{ cm}^3$ ), upon normalization to identical volumes (i.e. to  $(100 \text{ nm})^3$ ) of 1D and 3D structures, we calculated that 1193 QDs (e. g.  $(6.1 \times 10^4 \times (100 \text{ nm})^3) / (5.17 \times 10^{-14} \text{ cm}^3)$ ) were attached onto 3D  $\text{LaPO}_4$  urchin-like structures, whereas only 367 QDs (e. g.  $(2.94 \times (100 \text{ nm})^3) / (8.03 \times 10^{-18} \text{ cm}^3)$ ) were immobilized onto analogous 1D  $\text{LaPO}_4$  nanowires under comparable reaction conditions.

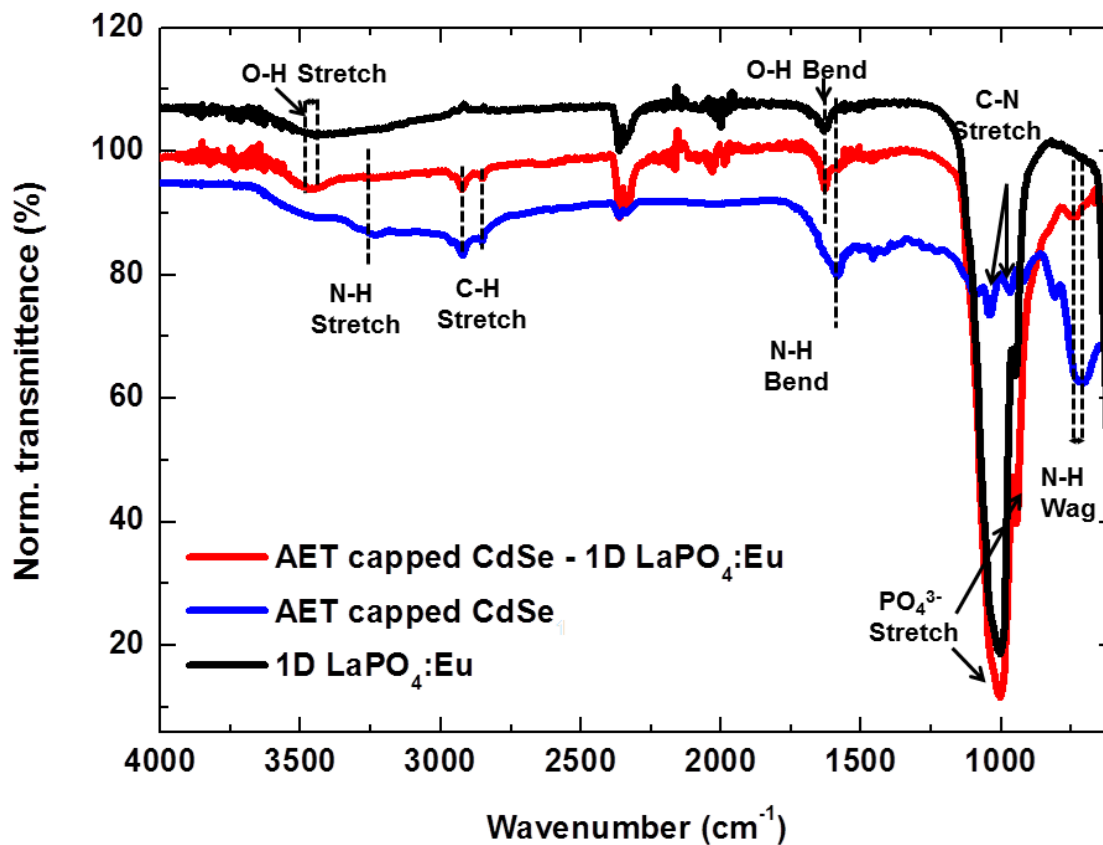

**Figure S7.** FT-IR spectra of LaPO<sub>4</sub>: Eu 1D nanowire structures, AET capped CdSe QDs, and CdSe QD-LaPO<sub>4</sub>: Eu 1D nanowire heterostructures.

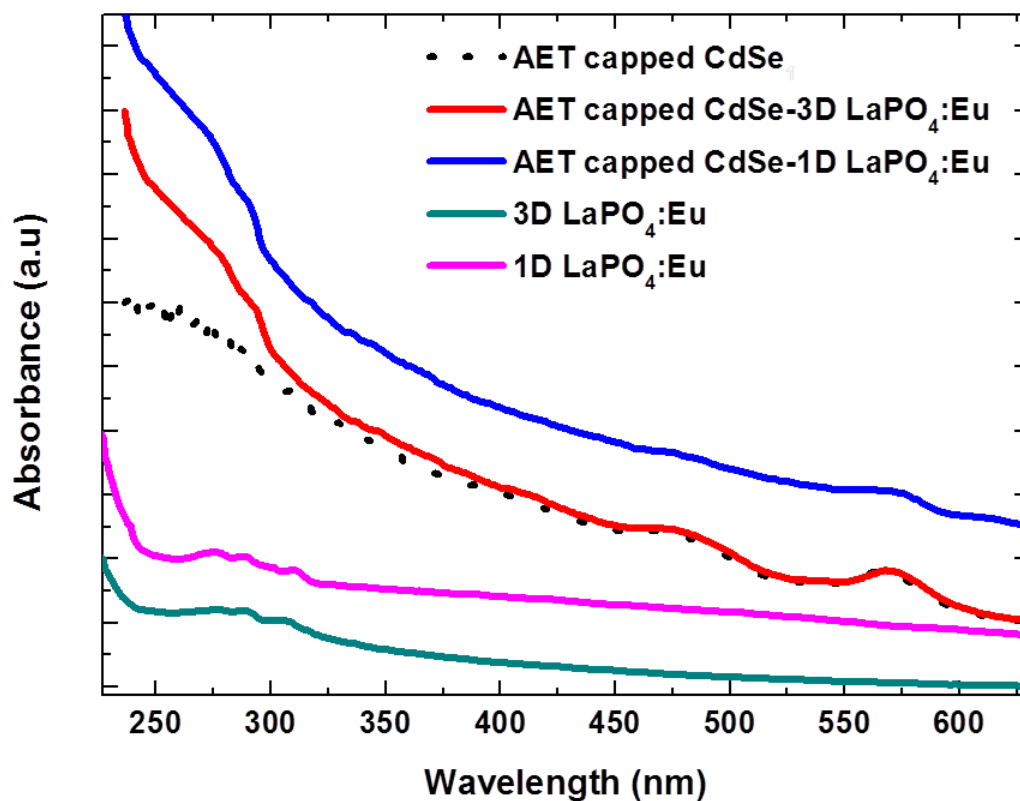

**Figure S8.** UV-visible spectra of AET capped CdSe QDs, LaPO<sub>4</sub>: Eu 3D urchin-like structures, 1D LaPO<sub>4</sub>: Eu nanowires, AET capped CdSe QD - LaPO<sub>4</sub>: Eu 3D urchin-like heterostructures, and AET capped CdSe QD - LaPO<sub>4</sub>: Eu 1D nanowire-based heterostructures.

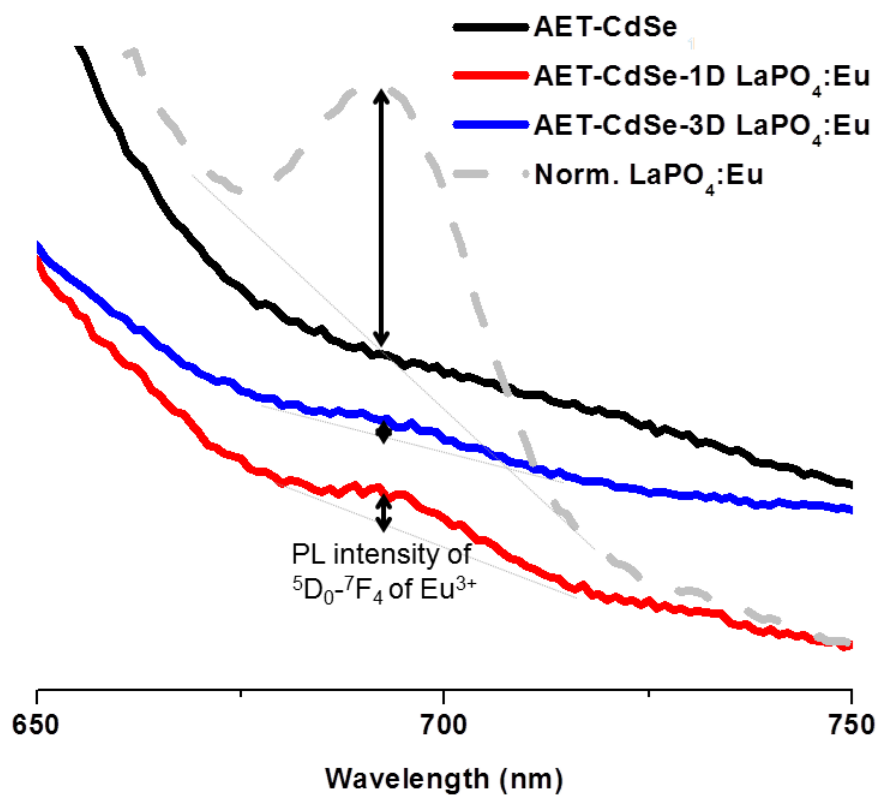

**Figure S9.** PL emission spectra of AET capped CdSe QDs, normalized LaPO<sub>4</sub>: Eu, AET capped CdSe QD - LaPO<sub>4</sub>: Eu 3D urchin-like heterostructures, and AET capped CdSe QD - LaPO<sub>4</sub>: Eu 1D nanowire-based heterostructures within the magnified region of 650-750 nm under 380 nm excitation.

**Table S1.** Kinetic parameters and emission decay analysis associated with CdSe QDs, CdSe QD-LaPO<sub>4</sub>: Eu 1D-nanowire heterostructures, CdSe QD-LaPO<sub>4</sub> 3D-based heterostructures, CdSe QD-LaPO<sub>4</sub>: Eu 3D-based heterostructures, CdSe QD-LaPO<sub>4</sub>: Ce 3D based heterostructures, and CdSe QD-LaPO<sub>4</sub>: Tb 3D-based heterostructures.

|                                      | $\tau_1$<br>(ns) | $\tau_2$<br>(ns) | $\tau_3$<br>(ns) | $a_1$  | $a_2$  | $a_3$  | $\tau_{av}$<br>(ns) | $\chi^2$ |
|--------------------------------------|------------------|------------------|------------------|--------|--------|--------|---------------------|----------|
| CdSe QDs                             | 5.146            | 23.82            | 1.133            | 0.044  | 0.0041 | 0.1634 | <b>7.3</b>          | 1.19     |
| CdSe QD-1D<br>LaPO <sub>4</sub> : Eu | 3.63             | 20.8             | 0.699            | 0.021  | 0.0011 | 0.2633 | <b>3.2</b>          | 1.18     |
| CdSe QD-3D<br>LaPO <sub>4</sub> : Eu | 4.22             | 23.0             | 0.8615           | 0.034  | 0.0022 | 0.217  | <b>5.1</b>          | 1.21     |
| CdSe QD-3D<br>LaPO <sub>4</sub> : Ce | 2.893            | 18.4             | 0.542            | 0.0075 | 0.0003 | 0.18   | <b>1.8</b>          | 1.06     |
| CdSe QD-3D<br>LaPO <sub>4</sub> : Tb | 4.32             | 20.5             | 0.9183           | 0.0396 | 0.0033 | 0.1751 | <b>5.7</b>          | 1.20     |
| CdSe QD-3D<br>LaPO <sub>4</sub>      | 3.21             | 13.95            | 0.756            | 0.0266 | 0.0013 | 0.2248 | <b>2.4</b>          | 1.16     |

Tri-exponential decay kinetics were noted to be satisfactory for the determination of emission lifetimes ( $\tau_i$ ). These values were then used to estimate the corresponding average lifetimes ( $\tau_{av}$  (or  $\langle t \rangle$ )) associated with the CdSe emission decay, using the following Equations S2 and S3.<sup>2,3</sup>

$$F(t) = a_1 \exp\left(-\frac{t}{\tau_1}\right) + a_2 \exp\left(-\frac{t}{\tau_2}\right) + a_3 \exp\left(-\frac{t}{\tau_3}\right) \quad \text{Equation S2}$$

$$\langle t \rangle = \frac{\sum a_i \tau_i^2}{\sum a_i \tau_i} \quad \text{Equation S3}$$

## References

1. R. Mooney, *Acta Crystallographica*, 1950, **3**, 337-340.
2. D. R. James, Y.-S. Liu, P. De Mayo and W. R. Ware, *Chemical Physics Letters*, 1985, **120**, 460-465.
3. S. N. Sharma, Z. S. Pillai and P. V. Kamat, *The Journal of Physical Chemistry B*, 2003, **107**, 10088-10093.
